# Supplementary material for: Identification and Characterization of Human Breast Milk and Infant Fecal Culturable Lactic Acid Bacteria Isolated in Bulgaria: A Pilot Study
Source: Preprints.org preprint supplement (doi:10.20944/preprints202408.0196.v1), 2024-08-02
Supplement: Supplementary file 1 [file supplementary]

## Sheet: List of Supplementary tables
Supplementary file 1:
List of supplementary tables and figures:
Table S1	Sample Information
Table S2	RAPD-PCR primers and reaction conditions
Figure S1	Isolates Identification
Table S3	MALDI-TOF Identification of the Isolates
Table S4	Isolates selected for 16 S rDNA Sequencing
Table S5	Strains selected for RAPD-PCR analysis
Table S6	Strain distrubition depens on its origin
Table S7	Comparison between strain identification with MALDI-TOF and 16S Sanger sequencing.

## Sheet: Sample Information
TABLE S1	Sample Information
Donor ID	Age	Birth Mode	Neonate Gender	Infant Feeding Type	Infant Antibiotic Supplementation	Infant Probiotic Supplementation	Mother Antibiotic Supplementation	Mother Probiotic Supplementation	Breast fedding week	Sample collection
KV	28	CS	male	MF	NO	YES	YES (during pregnancy and lactation period)	NO	4	MANUAL
M	29	CS	male	BF	NO	YES	YES (during lactation period)	NO	4	PUMP
El	33	VD	male	BF	NO	NO	NO	NO	3	MANUAL
Y	28	CS	female	BF	NO	NO	NO	NO	4	MANUAL
N	29	CS	female	BF	NO	YES	NO	NO	3	PUMP
Vr	28	CS	female	BF	NO	NO	NO	YES (during lactation period)	4	PUMP
Zdr	36	CS	female	BF	NO	NO	NO	NO	4	MANUAL
Sv	32	VD	female	BF	NO	YES Biogaia**	NO	NO	4	PUMP
1/24	25	VD	male	BF	NO	NO	NO	NO	4	MANUAL
5/24	31	CS	male	BF	NO	NO	NO	NO	4	PUMP
Iv	28	VD	female	BF	NO	YES Biogaia**	NO	NO	4	PUMP
L	33	VD	female	BF	NO	NO	NO	NO	3	PUMP
Hr	30	VD	male	MF	NO	NO	NO	NO	4	PUMP
40	32	VD	male	BF	NO	YES	NO	NO	4	PUMP
Legend:
*CS - Caesarean Section
*VD - Vaginal Delivery
*BF - Breast Feeding
*MF - Mixed Feeding
** L. reuteri

## Sheet: PCR-RAPD Primers Info
TABLE S2 RAPD-PCR primers and reaction conditions
RAPD-PCR Primer	5'-3' Sequence	Producer	PCR Program
rapd-04	5’-AAGAGCCCGT-3’	Sigma Aldrich	Initial denaturation: 95°C – 3 min; 30 cycles: 95°C – 30 sec, 34°C – 1 min, 72°C – 2,30 min; Final elongation: 72°C – 7 min
80A_RAPD [37]	5’-AGTCAGCCAC-3’	Sigma Aldrich	Initial denaturation: 94°C – 5 min; 35 cycles: 94°C – 1 min, 32°C – 2 min, 72°C – 2 min; Final elongation: 72°C – 5 min [40]
80B_RAPD_M13 [37]	5’-GAGGGTGGCGGTTCT-3’	Sigma Aldrich	Initial denaturation: 94°C – 5 min; 40 cycles: 94°C – 1 min, 42°C – 20 sec, 72°C – 2 min; Final elongation: 72°C – 10 min [40]
80C_RAPD_OPT-14 [37]	5’-AATGCCGCAG-3’	Sigma Aldrich	Initial denaturation: 94°C – 5 min; 45 cycles: 94°C – 1 min, 36°C – 1 min, 72°C – 2 min; Final elongation: 72°C – 7 min [40]

## Sheet: MALDI-TOF-MS Graph
FIG S1
Isolates Identification

## Sheet: MALDI Identification Isolates
TABLE S3	MALDI-TOF Identification
Strain Name	Donor ID	Sample Origin	MALDI-TOF Identification	Score
M1-1	M	BM	Lacticaseibacillus rhamnosus	2.24
M1-4	M	BM	Lacticaseibacillus paracasei	2.40
M1-5	M	BM	Lacticaseibacillus paracasei	2.51
M1F-2	M	F	Lacticaseibacillus rhamnosus	2.13
M1F-1	M	F	Lacticaseibacillus rhamnosus	2.08
M1F-3	M	F	Lacticaseibacillus rhamnosus	1.83
M1F-4	M	F	Limosilactobacillus fermentum	2.13
M1F-5	M	F	Limosilactobacillus fermentum	2.07
M1F-6	M	F	Lacticaseibacillus paracasei	1.96
M1F-7	M	F	Lacticaseibacillus rhamnosus	1.77
M1F-8	M	F	Lacticaseibacillus rhamnosus	1.79
M2-2	M	BM	Lacticaseibacillus paracasei	2.36
M2-3	M	BM	Lacticaseibacillus rhamnosus	1.96
M2F-4	M	F	Lacticaseibacillus rhamnosus	2.01
M2F-5	M	F	Lacticaseibacillus rhamnosus	1.91
KV1-1	KV	BM	Lacticaseibacillus rhamnosus	1.96
KV1-2	KV	BM	Lacticaseibacillus rhamnosus	1.82
KV1-3	KV	BM	Lacticaseibacillus rhamnosus	2.04
KV2-6	KV	BM	Lacticaseibacillus paracasei	1.77
KV1F-4	KV	F	Lacticaseibacillus rhamnosus	1.92
KV1F-5	KV	F	Lacticaseibacillus rhamnosus	2.06
KV1F-6	KV	F	Limosilactobacillus fermentum	1.73
KV2F-7	KV	F	Lacticaseibacillus paracasei	2.16
KV2F-2	KV	F	Lacticaseibacillus paracasei	2.13
KV2F-3	KV	F	Lacticaseibacillus rhamnosus	1.97
N1-1	N	BM	Lacticaseibacillus rhamnosus	1.91
N1F-1	N	F	Lacticaseibacillus rhamnosus	2.24
N1F-2	N	F	Lacticaseibacillus rhamnosus	2.04
El1-1	El	BM	Limosilactobacillus fermentum	2.13
El1-2	El	BM	Limosilactobacillus fermentum	2.30
El1-3	El	BM	Limosilactobacillus fermentum	2.09
El1-4	El	BM	Limosilactobacillus fermentum	2.11
El1-5	El	BM	Limosilactobacillus fermentum	2.15
El1-6	El	BM	Limosilactobacillus fermentum	2.12
El2-1	El	BM	Lactiplantibacillus plantarum	2.02
El1F-2	El	F	Limosilactobacillus fermentum	2.01
El1F-3	El	F	Limosilactobacillus fermentum	2.10
El1F-4	El	F	Limosilactobacillus reuteri	2.09
Sv1-1	Sv	BM	Lactiplantibacillus plantarum	2.05
Sv2F-1	Sv	F	Lactiplantibacillus plantarum	2.20
Sv2F-2	Sv	F	Limosilactobacillus reuteri	1.74
Zdr1F-1	Zdr	F	Limosilactobacillus fermentum	2.12
Zdr1F-2	Zdr	F	Limosilactobacillus fermentum	2.10
Zdr1F-3	Zdr	F	Limosilactobacillus fermentum	1.86
Zdr1F-4	Zdr	F	Limosilactobacillus fermentum	1.97
Y1-1	Y	BM	Limosilactobacillus fermentum	2.11
Y1-2	Y	BM	Limosilactobacillus fermentum	2.01
Y1F-3	Y	F	Limosilactobacillus fermentum	2.08
YF1-4	Y	F	Lacticaseibacillus paracasei	2.19
1/24-1	1/24	BM	Lactobacillus gasseri	1.80
1/24-2	1/24	BM	Lactobacillus gasseri	2.30
5/24F-1	5/24	F	Levilactobacillus brevis	2.25
Iv1-1	Iv	BM	Lacticaseibacillus rhamnosus	1.90
Iv1-2	Iv	BM	Lacticaseibacillus rhamnosus	1.83
Iv1-3	Iv	BM	Lacticaseibacillus paracasei	2.51
Iv1-4	Iv	BM	Lacticaseibacillus paracasei	2.47
Iv1-5	Iv	BM	Limosilactobacillus reuteri	1.93
Iv1-6	Iv	BM	Limosilactobacillus reuteri	1.90
L1-1	L	BM	Lacticaseibacillus rhamnosus	1.92
Hr1F-1	Hr	F	Lacticaseibacillus rhamnosus	2.27
Hr1F-2	Hr	F	Limosilactobacillus reuteri	2.09
Hr1F-3	Hr	F	Limosilactobacillus reuteri	2.18
Hr1F-4	Hr	F	Limosilactobacillus reuteri	2.05
Hr1F-5	Hr	F	Limosilactobacillus reuteri	1.89
Hr1F-6	Hr	F	Limosilactobacillus reuteri	1.80
Hr1F-7	Hr	F	Limosilactobacillus reuteri	2.00
40/2F-1	40	F	Lacticaseibacillus rhamnosus	1.97
40/2F-2	40	F	Lactobacillus zeae	2.06
BM - Breast milk
F - Infant Feces

## Sheet: Isolates Selected for 16S
TABLE S4	Isolates selected for 16 S rDNA Sequencing
Strain Name	Donor ID	Sample Origin	MALDI-TOF Identification
M1-1	M	BM	Lacticaseibacillus rhamnosus
M1-5	M	BM	Lacticaseibacillus paracasei
M1F-2	M	F	Lacticaseibacillus rhamnosus
KV1-1	KV	BM	Lacticaseibacillus rhamnosus
KV2-6	KV	BM	Lacticaseibacillus paracasei
KV1F-4	KV	F	Lacticaseibacillus rhamnosus
KV1F-5	KV	F	Lacticaseibacillus rhamnosus
N1-1	N	BM	Lacticaseibacillus rhamnosus
N1F-2	N	F	Lacticaseibacillus rhamnosus
El2-1	El	BM	Lactiplantibacillus plantarum
El1-2	El	BM	Limosilactobacillus fermentum
El1F-3	El	F	Limosilactobacillus fermentum
El1F-4	El	F	Limosilactobacillus reuteri
Sv1-1	Sv	BM	Lactiplantibacillus plantarum
Sv2F-1	Sv	F	Lactiplantibacillus plantarum
Sv2F-2	Sv	F	Limosilactobacillus reuteri
Zdr1F-1	Zdr	F	Limosilactobacillus fermentum
Y1F-3	Y	F	Limosilactobacillus fermentum
1/24-1	1/24	BM	Lactobacillus gasseri
1/24-2	1/24	BM	Lactobacillus gasseri
5/24F-1	5/24	F	Levilactobacillus brevis
Iv1-2	Iv	BM	Lacticaseibacillus rhamnosus
Iv1-1	Iv	BM	Lacticaseibacillus rhamnosus
L1-1	L	BM	Lacticaseibacillus rhamnosus
Hr1F-1	Hr	F	Lacticaseibacillus rhamnosus
40/2F-1	40	F	Lacticaseibacillus rhamnosus
40/2F-2	40	F	Lactobacillus zeae

## Sheet: Strains Selected for RAPD-PCR
TABLE S5		Strains selected for RAPD-PCR analisis
Lane	Strain Name	Donor ID	Sample Origin	MALDI-TOF Identification
1	M1F-2	M	F	Lacticaseibacillus rhamnosus
2	Iv1-2	Iv	BM	Lacticaseibacillus rhamnosus
3	Iv1-1	Iv	BM	Lacticaseibacillus rhamnosus
4	L1-1	L	BM	Lacticaseibacillus rhamnosus
5	M1-1	M	BM	Lacticaseibacillus rhamnosus
6	KV1F-4	KV	F	Lacticaseibacillus rhamnosus
7	N1-1	N	BM	Lacticaseibacillus rhamnosus
8	40/2F-1	40	F	Lacticaseibacillus rhamnosus
9	40/2F-2	40	F	Lactobacillus zeae
10	KV1F-5	KV	F	Lacticaseibacillus rhamnosus
11	Hr1F-1	Hr	F	Lacticaseibacillus rhamnosus
12	KV1-1	KV	BM	Lacticaseibacillus rhamnosus
13	KV2-6	KV	BM	Lacticaseibacillus paracasei
14	M1-5	M	BM	Lacticaseibacillus paracasei
15	N1F-2	N	F	Lacticaseibacillus rhamnosus
16			Type strain	Lacticaseibacillus rhamnosus ATCC 53103
17			Type strain	Lacticaseibacillus paracasei ATCC 334
BM - Breast milk
F - Infant Feces

## Sheet: Strain distribution
TABLE S6	Strain distrubition depens on its origin
Strain Name	Donor ID	Sample Origin	MALDI-TOF Identification	Donors in which the species occur
				BM	F
M1-1	M	BM	Lacticaseibacillus rhamnosus	M, KV, N, Iv, L	M, KV, N, Hr, 40
M1F-2	M	F	Lacticaseibacillus rhamnosus
M1F-1	M	F	Lacticaseibacillus rhamnosus
M1F-3	M	F	Lacticaseibacillus rhamnosus
M1F-7	M	F	Lacticaseibacillus rhamnosus
M1F-8	M	F	Lacticaseibacillus rhamnosus
M2-3	M	BM	Lacticaseibacillus rhamnosus
M2F-4	M	F	Lacticaseibacillus rhamnosus
M2F-5	M	F	Lacticaseibacillus rhamnosus
KV1-1	KV	BM	Lacticaseibacillus rhamnosus
KV1-2	KV	BM	Lacticaseibacillus rhamnosus
KV1-3	KV	BM	Lacticaseibacillus rhamnosus
KV1F-4	KV	F	Lacticaseibacillus rhamnosus
KV1F-5	KV	F	Lacticaseibacillus rhamnosus
KV2F-3	KV	F	Lacticaseibacillus rhamnosus
N1-1	N	BM	Lacticaseibacillus rhamnosus
N1F-1	N	F	Lacticaseibacillus rhamnosus
N1F-2	N	F	Lacticaseibacillus rhamnosus
Iv1-1	Iv	BM	Lacticaseibacillus rhamnosus
Iv1-2	Iv	BM	Lacticaseibacillus rhamnosus
L1-1	L	BM	Lacticaseibacillus rhamnosus
Hr1F-1	Hr	F	Lacticaseibacillus rhamnosus
40/2F-1	40	F	Lacticaseibacillus rhamnosus
M1F-4	M	F	Limosilactobacillus fermentum	El, Y	El, Y, M, KV, Zdr
M1F-5	M	F	Limosilactobacillus fermentum
KV1F-6	KV	F	Limosilactobacillus fermentum
El1-1	El	BM	Limosilactobacillus fermentum
El1-2	El	BM	Limosilactobacillus fermentum
El1-3	El	BM	Limosilactobacillus fermentum
El1-4	El	BM	Limosilactobacillus fermentum
El1-5	El	BM	Limosilactobacillus fermentum
El1-6	El	BM	Limosilactobacillus fermentum
El1F-2	El	F	Limosilactobacillus fermentum
El1F-3	El	F	Limosilactobacillus fermentum
Zdr1F-1	Zdr	F	Limosilactobacillus fermentum
Zdr1F-2	Zdr	F	Limosilactobacillus fermentum
Zdr1F-3	Zdr	F	Limosilactobacillus fermentum
Zdr1F-4	Zdr	F	Limosilactobacillus fermentum
Y1-1	Y	BM	Limosilactobacillus fermentum
Y1-2	Y	BM	Limosilactobacillus fermentum
Y1F-3	Y	F	Limosilactobacillus fermentum
M1-4	M	BM	Lacticaseibacillus paracasei	M, KV	M, KV, Y, Iv
M1-5	M	BM	Lacticaseibacillus paracasei
M1F-6	M	F	Lacticaseibacillus paracasei
M2-2	M	BM	Lacticaseibacillus paracasei
KV2-6	KV	BM	Lacticaseibacillus paracasei
KV2F-7	KV	F	Lacticaseibacillus paracasei
KV2F-2	KV	F	Lacticaseibacillus paracasei
YF1-4	Y	F	Lacticaseibacillus paracasei
Iv1-3	Iv	BM	Lacticaseibacillus paracasei
Iv1-4	Iv	BM	Lacticaseibacillus paracasei
El1F-4	El	F	Limosilactobacillus reuteri	Iv	El, Sv, Hr
Sv2F-2	Sv	F	Limosilactobacillus reuteri
Iv1-5	Iv	BM	Limosilactobacillus reuteri
Iv1-6	Iv	BM	Limosilactobacillus reuteri
Hr1F-2	Hr	F	Limosilactobacillus reuteri
Hr1F-3	Hr	F	Limosilactobacillus reuteri
Hr1F-4	Hr	F	Limosilactobacillus reuteri
Hr1F-5	Hr	F	Limosilactobacillus reuteri
Hr1F-6	Hr	F	Limosilactobacillus reuteri
Hr1F-7	Hr	F	Limosilactobacillus reuteri
El2-1	El	BM	Lactiplantibacillus plantarum	El, Sv	Sv
Sv1-1	Sv	BM	Lactiplantibacillus plantarum
Sv2F-1	Sv	F	Lactiplantibacillus plantarum
1/24-1	1/24	BM	Lactobacillus gasseri	1/24
1/24-2	1/24	BM	Lactobacillus gasseri
5/24F-1	5/24	F	Levilactobacillus brevis		5/24
40/2F-2	40	F	Lactobacillus zeae		40
BM - Breast milk
F - Infant Feces

## Sheet: Comparison MALDI-TOF - 16S
Table S7
Comparison between strain identification with MALDI-TOF and 16S Sanger sequencing.
Strain Name	Donor ID	Sample Origin	MALDI-TOF identification	16S sequencing identification	Best BLAST match	Identitiy, %
M1-1	M	BM	Lacticaseibacillus rhamnosus	Lactobacillus rhamnosus	KP090121.1 Lactobacillus rhamnosus strain LE59	99.86
M1-5	M	BM	Lacticaseibacillus paracasei	Lacticaseibacillus paracasei	MT626061.1 Lacticaseibacillus paracasei	100
M1F-2	M	F	Lacticaseibacillus rhamnosus	Lactobacillus rhamnosus	MT613481.1 Lacticaseibacillus rhamnosus strain 3087	99.33
KV1-1	KV	BM	Lacticaseibacillus rhamnosus	Lactobacillus rhamnosus	MT611888.1 Lacticaseibacillus rhamnosus strain 2949	99.79
KV2-6	KV	BM	Lacticaseibacillus paracasei	Lacticaseibacillus paracasei	MT626061.1 Lacticaseibacillus paracasei	99.86
KV1F-4	KV	F	Lacticaseibacillus rhamnosus	Lactobacillus rhamnosus	MT611888.1 Lacticaseibacillus rhamnosus strain 2949	99.93
KV1F-5	KV	F	Lacticaseibacillus rhamnosus	Lactobacillus rhamnosus	MT613492.1 Lacticaseibacillus rhamnosus strain 3105	99.64
N1-1	N	BM	Lacticaseibacillus rhamnosus	Lactobacillus rhamnosus	MT611888.1 Lacticaseibacillus rhamnosus strain 2949	99.93
N1F-2	N	F	Lacticaseibacillus rhamnosus	Lactobacillus rhamnosus	MT613492.1 Lacticaseibacillus rhamnosus strain 3105	100
El2-1	El	BM	Lactiplantibacillus plantarum	Lactiplantibacillus plantarum	MG825683.1 Lactiplantibacillus plantarum strain Lb12	99.93
El1-2	El	BM	Limosilactobacillus fermentum	Limosilactobacillus fermentum	MT613448.1 Limosilactobacillus fermentum strain 3031	99.86
El1F-3	El	F	Limosilactobacillus fermentum	Limosilactobacillus fermentum	MF354685.1 Limosilactobacillus fermentum strain CAU:2179 99,93	99.93
El1F-4	El	F	Limosilactobacillus reuteri	Limosilactobacillus reuteri	KX688681.1 Limosilactobacillus reuteri strain 04-2A02	99.71
Sv1-1	Sv	BM	Lactiplantibacillus plantarum	Lactiplantibacillus pentosus	OP236733.1 Lactiplantibacillus pentosus strain MGB0733	99.78
Sv2F-1	Sv	F	Lactiplantibacillus plantarum	Lactiplantibacillus plantarum	PP908373.1 Lactiplantibacillus plantarum strain GT2	100
Sv2F-2	Sv	F	Limosilactobacillus reuteri	Limosilactobacillus reuteri	MF686468.1 Limosilactobacillus reuteri strain ABRIG8	99.77
Zdr1F-1	Zdr	F	Limosilactobacillus fermentum	Limosilactobacillus fermentum	CP157980.1 Limosilactobacillus fermentum strain JF9	100
Y1F-3	Y	F	Limosilactobacillus fermentum	Limosilactobacillus fermentum	MT613485.1 Limosilactobacillus fermentum strain 3096	99.86
1/24-1	1/24	BM	Lactobacillus gasseri	Lactobacillus gasseri	KY003103.1 Lactobacillus gasseri strain SHZ67	99.37
1/24-2	1/24	BM	Lactobacillus gasseri	Lactobacillus gasseri	MT613630.1 Lactobacillus gasseri strain 3338	100
5/24F-1	5/24	F	Levilactobacillus brevis	Levilactobacillus brevis	OR502339.1 Levilactobacillus brevis strain HBUR51315	99.56
Iv1-2	Iv	BM	Lacticaseibacillus rhamnosus	Lacticaseibacillus rhamnosus	MT645513.1 Lacticaseibacillus rhamnosus strain 8562	99.7
Iv1-1	Iv	BM	Lacticaseibacillus rhamnosus	Lacticaseibacillus rhamnosus	MT505582. Lacticaseibacillus rhamnosus strain 4812	99.78
L1-1	L	BM	Lacticaseibacillus rhamnosus	Lacticaseibacillus rhamnosus	MT505582.1 Lacticaseibacillus rhamnosus strain 4812	99.71
Hr1F-1	Hr	F	Lacticaseibacillus rhamnosus	Lacticaseibacillus rhamnosus	MT463814.1 Lacticaseibacillus rhamnosus strain 6570	99.71
40/2F-1	40	F	Lacticaseibacillus rhamnosus	Lacticaseibacillus rhamnosus	JX556102.1 Lactobacillus rhamnosus strain Y1	99.93
40/2F-2	40	F	Lactobacillus zeae	no reliable identification
BM - Breast milk
F - Infant Feces
